# Supplementary material
Source: MDPI journal article supplement (https://www.mdpi.com/2571-6182/6/2/20)
Supplement: s1 [file s1]

# Fundamentals and Applications of Nonthermal Plasma Fluid

## Flows: A Review

Masaaki Okubo

### Supplemental data

Table S1. Considered chemical reactions

| No. | Chemical reactions                                                                                        | $A, \text{m}^3 \text{kmol}^{-1} \text{K}^{-n} \text{s}^{-1}$ | $n$  | $E_j/R, \text{K}$ |
|-----|-----------------------------------------------------------------------------------------------------------|--------------------------------------------------------------|------|-------------------|
| 1   | $\text{e} + \text{N}_2 \rightarrow \text{N}_2^+ + 2\text{e}$                                              | Collision cross section 1                                    |      |                   |
| 2   | $\text{e} + \text{N}_2 \rightarrow \text{N}^+ + \text{N} + 2\text{e}$                                     | Collision cross section 1                                    |      |                   |
| 3   | $\text{e} + \text{N}_2 \leftrightarrow \text{N}_2(\text{A}^3\Sigma_u^+) + \text{e}$                       | Collision cross section 2                                    |      |                   |
| 4   | $\text{e} + \text{N}_2 \leftrightarrow \text{N}_2(\text{a}^1\Sigma_u^-) + \text{e}$                       | Collision cross section 3                                    |      |                   |
| 5   | $\text{e} + \text{N}_4^+ \rightarrow 2\text{N}_2$                                                         | 3.22E-13                                                     | -0.5 | 0                 |
| 6   | $\text{e} + \text{N}_2^+ \rightarrow 2\text{N}$                                                           | 4.50E-14                                                     | -0.5 | 0                 |
| 7   | $\text{e} + \text{N}_2^+ \rightarrow 2\text{N}$                                                           | 3.38E-13                                                     | -0.5 | 0                 |
| 8   | $2\text{e} + \text{N}_2^+ \rightarrow 2\text{N} + \text{e}$                                               | 7.18E-39                                                     | -4.5 | 0                 |
| 9   | $\text{e} + \text{N}_2^{++} + \text{N}_2 \rightarrow 2\text{N}_2$                                         | 2.49E-41                                                     | -1.5 | 0                 |
| 10  | $\text{e} + \text{N}_3^+ \rightarrow \text{N}_2 + \text{N}$                                               | 3.22E-24                                                     | -0.5 | 0                 |
| 11  | $\text{N}_2^+ + 2\text{N}_2 \rightarrow \text{N}_4^+ + \text{N}_2$                                        | 5.00E-41                                                     | 0    | 0                 |
| 12  | $\text{N}_2^+ + \text{N}_2 + \text{N} \rightarrow \text{N}_3^+ + \text{N}_2$                              | 3.40E-41                                                     | 0    | 0                 |
| 13  | $\text{N}_2^+ + \text{N}_2(\text{A}^3\Sigma_u^+) \rightarrow \text{N}_3^+ + \text{N}$                     | 3.00E-16                                                     | 0    | 0                 |
| 14  | $\text{N}_2^+ + \text{N} \rightarrow \text{N}^+ + \text{N}_2$                                             | 7.00E-19                                                     | 0    | 0                 |
| 15  | $\text{N}_3^+ + \text{N} \rightarrow \text{N}_2^+ + 2\text{N}$                                            | 6.60E-17                                                     | 0    | 0                 |
| 16  | $\text{N}_4^+ + \text{N}_2 \rightarrow \text{N}_2^+ + 2\text{N}_2$                                        | 2.40E-21                                                     | 0    | 0                 |
| 17  | $\text{N}_4^+ + \text{N} \rightarrow \text{N}^+ + 2\text{N}_2$                                            | 1.00E-17                                                     | 0    | 0                 |
| 18  | $\text{N}^+ + \text{N}_2 + \text{N} \rightarrow \text{N}_2^+ + \text{N}_2$                                | 1.00E-41                                                     | 0    | 0                 |
| 19  | $\text{N}_2(\text{A}^3\Sigma_u^+) + \text{N} \rightarrow \text{N}_2 + \text{N}$                           | 4.00E-17                                                     | 0    | 0                 |
| 20  | $\text{N}_2(\text{a}^1\Sigma_u^-) + \text{N}_2 \rightarrow \text{N}_2(\text{B}^3\Pi_g) + \text{N}_2$      | 2.00E-19                                                     | 0    | 0                 |
| 21  | $\text{N}_2(\text{A}^3\Sigma_u^+) + \text{N}_2(\text{a}^1\Sigma_u^-) \rightarrow \text{N}_4^+ + \text{e}$ | 5.00E-17                                                     | 0    | 0                 |
| 22  | $2\text{N}_2(\text{a}^1\Sigma_u^-) \rightarrow \text{N}_4^+ + \text{e}$                                   | 7.70E-17                                                     | 0    | 0                 |

|    |                                                                                          |                            |      |       |
|----|------------------------------------------------------------------------------------------|----------------------------|------|-------|
| 23 | $2\text{N}_2(\text{A}^3\Sigma_u^+) \rightarrow \text{N}_2 + \text{N}_2(\text{B}^3\Pi_g)$ | 2.00E-16                   | 0    | 0     |
| 24 | $2\text{N}_2(\text{A}^3\Sigma_u^+) \rightarrow \text{N}_2 + \text{N}_2(\text{C}^3\Pi_u)$ | 2.00E-16                   | 0    | 0     |
| 25 | $\text{N}_2(\text{A}^3\Sigma_u^+) + e \rightarrow \text{N}_2^+ + 2e$                     | Collision cross section 4  |      |       |
| 26 | $\text{N}_2(\text{a}^1\Sigma_u^-) + e \rightarrow \text{N}_2^+ + 2e$                     | Collision cross section 4  |      |       |
| 27 | $e + \text{N}_2 \rightarrow e + \text{N}_2$                                              | Collision cross section 5  |      |       |
| 28 | $\text{N}_2(\text{B}^3\Pi_g) + \text{N}_2 \rightarrow 2\text{N}_2$                       | 1.00E-17                   | 0    | 0     |
| 29 | $\text{N}_2(\text{B}^3\Pi_g) \rightarrow \text{N}_2$                                     | 1.00E+05                   | 0    | 0     |
| 30 | $\text{N}_2(\text{C}^3\Pi_u) + \text{N}_2 \rightarrow 2\text{N}_2$                       | 1.00E-17                   | 0    | 0     |
| 31 | $\text{N}_2(\text{C}^3\Pi_u) \rightarrow \text{N}_2(\text{B}^3\Pi_g)$                    | 2.50E+07                   | 0    | 0     |
| 32 | $e + \text{O}_2 \rightarrow \text{O}^- + \text{O}$                                       | Collision cross section 6  |      |       |
| 33 | $e + \text{O}_2 \leftrightarrow e + \text{O}_2 (\nu)$                                    | Collision cross section 7  |      |       |
| 34 | $e + \text{O}_2 \rightarrow e + \text{O}_2$                                              | Collision cross section 8  |      |       |
| 35 | $e + \text{O}_2 \rightarrow e + \text{O}_2$                                              | Collision cross section 9  |      |       |
| 36 | $e + \text{O}_2 \rightarrow e + \text{O}_2$                                              | Collision cross section 10 |      |       |
| 37 | $e + \text{O}_2 \leftrightarrow e + \text{O}_2 (\text{a}^1\Delta)$                       | Collision cross section 11 |      |       |
| 38 | $e + \text{O}_2 \leftrightarrow e + \text{O}_2 (\text{b}^1\Sigma)$                       | Collision cross section 12 |      |       |
| 39 | $e + \text{O}_2 \rightarrow e + 2\text{O}$                                               | Collision cross section 13 |      |       |
| 40 | $e + \text{O}_2 \rightarrow e + \text{O} + \text{O} (^1\text{D})$                        | Collision cross section 14 |      |       |
| 41 | $e + \text{O}_2 \rightarrow 2e + \text{O}_2^+$                                           | Collision cross section 15 |      |       |
| 42 | $e + \text{O}_2 \rightarrow 2e + \text{O} + \text{O}^+$                                  | Collision cross section 16 |      |       |
| 43 | $e + 2 \text{O}_2 \rightarrow \text{O}_2^- + \text{O}_2$                                 | 3.60E-43                   | -0.5 | 0     |
| 44 | $e + \text{O}_2^+ \rightarrow 2\text{O}$                                                 | Collision cross section 17 |      |       |
| 45 | $e + \text{O}_2^+ \rightarrow \text{O} (^1\text{D}) + \text{O}$                          | Collision cross section 17 |      |       |
| 46 | $e + \text{O}_2 (\text{a}^1\Delta) \rightarrow 2e + \text{O}_2^+$                        | Collision cross section 18 |      |       |
| 47 | $e + \text{O}_2 (\text{b}^1\Sigma) \rightarrow 2e + \text{O}_2^+$                        | 1.36E-15                   | 1.1  | 10.43 |
| 48 | $e + \text{O}_3 \rightarrow \text{O}^- + \text{O}_2$                                     | Collision cross section 19 |      |       |
| 49 | $e + \text{O}_3 \rightarrow \text{O}_2^- + \text{O}$                                     | Collision cross section 20 |      |       |
| 50 | $e + \text{O} \rightarrow e + \text{O} (^1\text{D})$                                     | Collision cross section 21 |      |       |
| 51 | $e + \text{O} \leftrightarrow e + \text{O} (^1\text{S})$                                 | Collision cross section 22 |      |       |
| 52 | $e + \text{O} \rightarrow 2e + \text{O}^+$                                               | Collision cross section 23 |      |       |
| 53 | $e + \text{O} (^1\text{D}) \rightarrow e + \text{O}$                                     | Collision cross section 24 |      |       |
| 54 | $e + \text{O} (^1\text{D}) \rightarrow 2e + \text{O}^+$                                  | Collision cross section 25 |      |       |

|    |                                                     |                            |      |      |
|----|-----------------------------------------------------|----------------------------|------|------|
| 55 | $e + O(^1S) \rightarrow 2e + O^+$                   | 6.60E-15                   | 0.6  | 9.43 |
| 56 | $e + O^- \rightarrow 2e + O$                        | 1.95E-18                   | 0.5  | 3.4  |
| 57 | $e + O^+ \rightarrow O(^1D)$                        | 5.30E-19                   | -0.5 | 0    |
| 58 | $2e + O^+ \rightarrow e + O(^1D)$                   | 5.12E-39                   | -4.5 | 0    |
| 59 | $e + O \rightarrow e + O$                           | Collision cross section 26 |      |      |
| 60 | $e + O \rightarrow e + O$                           | Collision cross section 27 |      |      |
| 61 | $e + O \rightarrow e + O$                           | Collision cross section 28 |      |      |
| 62 | $e + O \rightarrow e + O$                           | Collision cross section 29 |      |      |
| 63 | $e + O \rightarrow e + O$                           | Collision cross section 30 |      |      |
| 64 | $e + O(^1D) \rightarrow e + O(^1D)$                 | Collision cross section 26 |      |      |
| 65 | $e + O(^1S) \rightarrow e + O(^1S)$                 | Collision cross section 26 |      |      |
| 66 | $e + O_2 \rightarrow e + O_2$                       | Collision cross section 31 |      |      |
| 67 | $e + O_2(a^1\Delta) \rightarrow e + O_2(a^1\Delta)$ | Collision cross section 31 |      |      |
| 68 | $e + O_2(b^1\Sigma) \rightarrow e + O_2(b^1\Sigma)$ | Collision cross section 31 |      |      |
| 69 | $e + O_2(v) \rightarrow e + O_2(v)$                 | Collision cross section 31 |      |      |
| 70 | $e + O_2^{**} \rightarrow e + O_2^{**}$             | Collision cross section 31 |      |      |
| 71 | $e + O_2 \rightarrow e + O_2$                       | Collision cross section 32 |      |      |
| 72 | $e + O_2 \rightarrow e + O_2$                       | Collision cross section 33 |      |      |
| 73 | $e + O_2 \rightarrow e + O_2$                       | Collision cross section 34 |      |      |
| 74 | $e + O_2 \rightarrow e + O_2$                       | Collision cross section 35 |      |      |
| 75 | $e + O_2 \rightarrow e + O_2$                       | Collision cross section 36 |      |      |
| 76 | $e + O_2 \rightarrow e + O_2$                       | Collision cross section 37 |      |      |
| 77 | $e + O_2(a^1\Delta) \rightarrow e + O_2(b^1\Sigma)$ | Collision cross section 38 |      |      |
| 78 | $e + O_2(b^1\Sigma) \rightarrow e + O_2(a^1\Delta)$ | Collision cross section 39 |      |      |
| 79 | $e + O_2 \rightarrow e + O_2^{**}$                  | Collision cross section 40 |      |      |
| 80 | $e + O_2^{**} \rightarrow e + O_2$                  | Collision cross section 41 |      |      |
| 81 | $e + O_2(a^1\Delta) \rightarrow e + O_2^{**}$       | Collision cross section 42 |      |      |
| 82 | $e + O_2 \rightarrow e + O + O(^1S)$                | Collision cross section 43 |      |      |
| 83 | $e + O_2(a^1\Delta) \rightarrow O^- + O$            | Collision cross section 44 |      |      |
| 84 | $e + O_2^+ \rightarrow O_2^{**}$                    | Collision cross section 45 |      |      |
| 85 | $e + O_3 \rightarrow e + O_3$                       | Collision cross section 46 |      |      |
| 86 | $O^- + O_2^+ \rightarrow O + O_2$                   | 5.96E-11                   | -1   | 0    |
| 87 | $O^- + O_2^+ \rightarrow 3O$                        | 1.00E-13                   | 0    | 0    |

|     |                                                                                           |          |      |   |
|-----|-------------------------------------------------------------------------------------------|----------|------|---|
| 88  | $\text{O}^- + \text{O}^+ \rightarrow 2\text{O}$                                           | 5.96E-11 | -1   | 0 |
| 89  | $\text{O}_2^- + \text{O}_2^+ \rightarrow 2 \text{O}_2$                                    | 5.96E-11 | -1   | 0 |
| 90  | $\text{O}_2^- + \text{O}_2^+ \rightarrow \text{O}_2 + 2\text{O}$                          | 1.0E-13  | 0    | 0 |
| 91  | $\text{O}_2^- + \text{O}^+ \rightarrow \text{O}_2 + \text{O}$                             | 5.96E-11 | -1   | 0 |
| 92  | $\text{O}_3^- + \text{O}_2^+ \rightarrow \text{O}_3 + \text{O}_2$                         | 5.96E-11 | -1   | 0 |
| 93  | $\text{O}_3^- + \text{O}_2^+ \rightarrow \text{O}_3 + 2\text{O}$                          | 1.00E-13 | 0    | 0 |
| 94  | $\text{O}_3^- + \text{O}^+ \rightarrow \text{O}_3 + \text{O}$                             | 5.96E-11 | -1   | 0 |
| 95  | $\text{O}^- + \text{O}_2^+ + \text{O}_2 \rightarrow \text{O} + 2 \text{O}_2$              | 3.07E-31 | -2.5 | 0 |
| 96  | $\text{O}^- + \text{O}^+ + \text{O}_2 \rightarrow 2\text{O} + \text{O}_2$                 | 3.07E-31 | -2.5 | 0 |
| 97  | $\text{O} + \text{O}^- \rightarrow \text{O}_2 + \text{e}$                                 | 1.16E-17 | 0.5  | 0 |
| 98  | $\text{O}^- + \text{O}_2 (\text{a}^1\Delta) \rightarrow \text{O}_3 + \text{e}$            | 1.74E-17 | 0.5  | 0 |
| 99  | $\text{O}^- + \text{O}_2 (\text{b}^1\Sigma) \rightarrow \text{O} + \text{O}_2 + \text{e}$ | 4.00E-17 | 0.5  | 0 |
| 100 | $\text{O}^- + \text{O}_2 \rightarrow \text{O}_3 + \text{e}$                               | 2.90E-22 | 0.5  | 0 |
| 101 | $\text{O}^- + \text{O}_3 \rightarrow 2 \text{O}_2 + \text{e}$                             | 1.74E-17 | 0.5  | 0 |
| 102 | $\text{O}^- + \text{O}_3 \rightarrow \text{O}_3^- + \text{O}$                             | 1.15E-17 | 0.5  | 0 |
| 103 | $\text{O}^- + \text{O}_3 \rightarrow \text{O}_2^- + \text{O}_2$                           | 5.91E-19 | 0.5  | 0 |
| 104 | $\text{O}_2^- + \text{O} \rightarrow \text{O}^- + \text{O}_2$                             | 8.69E-18 | 0.5  | 0 |
| 105 | $\text{O}_2^- + \text{O} \rightarrow \text{O}_3 + \text{e}$                               | 8.69E-18 | 0.5  | 0 |
| 106 | $\text{O}_2^- + \text{O}_2 (\text{a}^1\Delta) \rightarrow 2\text{O}_2 + \text{e}$         | 1.16E-17 | 0.5  | 0 |
| 107 | $\text{O}_2^- + \text{O}_3 \rightarrow \text{O}_3^- + \text{O}_2$                         | 3.75E-17 | 0.5  | 0 |
| 108 | $\text{O}_3^- + \text{O} \rightarrow \text{O}_2^- + \text{O}_2$                           | 1.45E-17 | 0.5  | 0 |
| 109 | $\text{O} + \text{O}^+ + \text{O}_2 \rightarrow \text{O}_2^+ + \text{O}_2$                | 5.79E-43 | 0.5  | 0 |

|     |                                                                                                                           |          |       |      |
|-----|---------------------------------------------------------------------------------------------------------------------------|----------|-------|------|
| 110 | $\text{O}^+ + \text{O}_2 \rightarrow \text{O}_2^+ + \text{O}$                                                             | 1.95E-16 | -0.4  | 0    |
| 111 | $\text{O}^+ + \text{O}_3 \rightarrow \text{O}_2 + \text{O}_2^+$                                                           | 1.00E-16 | 0     | 0    |
| 112 | $\text{O} (^1\text{D}) + \text{O} \rightarrow 2\text{O}$                                                                  | 8.00E-18 | 0     | 0    |
| 113 | $\text{O} (^1\text{D}) + \text{O}_2 \rightarrow \text{O} + \text{O}_2 (\text{b}^1\Sigma)$                                 | 2.56E-17 | 0     | -67  |
| 114 | $\text{O} (^1\text{D}) + \text{O}_2 \rightarrow \text{O} + \text{O}_2 (\text{a}^1\Delta)$                                 | 1.60E-18 | 0     | -67  |
| 115 | $\text{O} (^1\text{D}) + \text{O}_2 \rightarrow \text{O} + \text{O}_2$                                                    | 4.80E-18 | 0     | -67  |
| 116 | $\text{O} (^1\text{D}) + \text{O}_3 \rightarrow \text{O}_2 + 2\text{O}$                                                   | 1.20E-16 | 0     | 0    |
| 117 | $\text{O} (^1\text{D}) + \text{O}_3 \rightarrow 2 \text{O}_2$                                                             | 1.20E-16 | 0     | 0    |
| 118 | $\text{O} (^1\text{S}) + \text{O}_2 \rightarrow \text{O} (^1\text{D}) + \text{O}_2$                                       | 3.20E-18 | 0     | 850  |
| 119 | $\text{O} (^1\text{S}) + \text{O}_2 \rightarrow \text{O} + \text{O}_2$                                                    | 1.60E-18 | 0     | 850  |
| 120 | $\text{O} (^1\text{S}) + \text{O}_2 (\text{a}^1\Delta) \rightarrow \text{O} + \text{O}$                                   | 1.10E-16 | 0     | 0    |
| 121 | $\text{O} (^1\text{S}) + \text{O}_2 (\text{a}^1\Delta) \rightarrow \text{O} (^1\text{D}) + \text{O}_2 (\text{b}^1\Sigma)$ | 2.90E-17 | 0     | 0    |
| 122 | $\text{O} (^1\text{S}) + \text{O}_2 (\text{a}^1\Delta) \rightarrow 3\text{O}$                                             | 3.20E-17 | 0     | 0    |
| 123 | $\text{O} (^1\text{S}) + \text{O} \rightarrow \text{O} (^1\text{D}) + \text{O}$                                           | 1.67E-17 | 0     | 300  |
| 124 | $\text{O} (^1\text{S}) + \text{O} \rightarrow 2\text{O}$                                                                  | 3.33E-17 | 0     | 300  |
| 125 | $\text{O} (^1\text{S}) + \text{O}_3 \rightarrow 2 \text{O}_2$                                                             | 5.80E-16 | 0     | 0    |
| 126 | $\text{O}_2 (\text{a}^1\Delta) + \text{O} \rightarrow \text{O}_2 + \text{O}$                                              | 2.00E-22 | 0     | 0    |
| 127 | $\text{O}_2 (\text{a}^1\Delta) + \text{O}_2 \rightarrow 2 \text{O}_2$                                                     | 3.00E-24 | 0     | 200  |
| 128 | $2 \text{O}_2 (\text{a}^1\Delta) \rightarrow 2 \text{O}_2$                                                                | 9.00E-23 | 0     | 560  |
| 129 | $2 \text{O}_2 (\text{a}^1\Delta) \rightarrow \text{O}_2 + \text{O}_2 (\text{b}^1\Sigma)$                                  | 9.00E-23 | 0     | 560  |
| 130 | $2 \text{O}_2 (\text{a}^1\Delta) + \text{O}_2 \rightarrow 2\text{O}_3$                                                    | 1.00E-40 | 0     | 560  |
| 131 | $\text{O}_2 (\text{a}^1\Delta) + \text{O}_3 \rightarrow 2 \text{O}_2 + \text{O}$                                          | 1.71E-28 | 0.5   | 0    |
| 132 | $\text{O}_2 (\text{a}^1\Delta) + \text{O}_3 \rightarrow 2 \text{O}_2 + \text{O}$                                          | 5.20E-17 | 0     | 2840 |
| 133 | $2 \text{O}_2 (\text{b}^1\Sigma) \rightarrow \text{O}_2 + \text{O}_2 (\text{a}^1\Delta)$                                  | 2.09E-24 | 0.5   | 0    |
| 134 | $\text{O}_2 (\text{b}^1\Sigma) + \text{O}_2 \rightarrow \text{O}_2 (\text{a}^1\Delta) + \text{O}_2$                       | 2.09E-25 | 0.5   | 0    |
| 135 | $\text{O}_2 (\text{b}^1\Sigma) + \text{O}_2 \rightarrow 2 \text{O}_2$                                                     | 2.32E-25 | 0.5   | 0    |
| 136 | $\text{O}_2 (\text{b}^1\Sigma) + \text{O} \rightarrow \text{O}_2 (\text{a}^1\Delta) + \text{O}$                           | 4.17E-21 | 0.5   | 0    |
| 137 | $\text{O}_2 (\text{b}^1\Sigma) + \text{O} \rightarrow \text{O}_2 + \text{O}$                                              | 4.63E-22 | 0.5   | 0    |
| 138 | $\text{O}_2 (\text{b}^1\Sigma) + \text{O}_3 \rightarrow \text{O} + 2 \text{O}_2$                                          | 4.25E-19 | 0.5   | 0    |
| 139 | $\text{O}_2 (\text{b}^1\Sigma) + \text{O}_3 \rightarrow \text{O}_2 (\text{b}^1\Sigma) + \text{O}_3$                       | 4.25E-19 | 0.5   | 0    |
| 140 | $\text{O}_2 (\text{b}^1\Sigma) + \text{O}_3 \rightarrow \text{O}_2 + \text{O}_3$                                          | 4.25E-19 | 0.5   | 0    |
| 141 | $\text{O}_2 (\text{v}) + \text{O} \rightarrow \text{O}_2 + \text{O}$                                                      | 5.79E-22 | 0.5   | 0    |
| 142 | $\text{O}_2 (\text{v}) + \text{O}_2 \rightarrow 2 \text{O}_2$                                                             | 5.79E-22 | 0.5   | 0    |
| 143 | $2\text{O} + \text{O}_2 \rightarrow 2 \text{O}_2$                                                                         | 9.27E-45 | -0.63 | 0    |
| 144 | $3\text{O} \rightarrow \text{O}_2 + \text{O}$                                                                             | 3.33E-44 | -0.63 | 0    |

|     |                                                                                                                |          |       |       |
|-----|----------------------------------------------------------------------------------------------------------------|----------|-------|-------|
| 145 | $2\text{O} + \text{O}_2 \rightarrow \text{O}_2 (\text{a}^1\Delta) + \text{O}_2$                                | 6.99E-46 | -0.63 | 0     |
| 146 | $3\text{O} \rightarrow \text{O}_2 (\text{a}^1\Delta) + \text{O}$                                               | 2.51E-45 | -0.63 | 0     |
| 147 | $\text{O} + 2 \text{O}_2 \rightarrow \text{O}_3 + \text{O}_2$                                                  | 5.08E-39 | -2.8  | 0     |
| 148 | $2\text{O} + \text{O}_2 \rightarrow \text{O}_3 + \text{O}$                                                     | 3.17E-43 | -1.2  | 0     |
| 149 | $\text{O} + \text{O}_3 \rightarrow 2 \text{O}_2$                                                               | 8.00E-18 | 0     | 2060  |
| 150 | $\text{O}_3 + \text{O}_2 \rightarrow 2 \text{O}_2 + \text{O}$                                                  | 1.56E-15 | 0     | 11490 |
| 151 | $\text{O}_2^{**} \rightarrow \text{O}_2$                                                                       | 1.50E-02 | 0     | 0     |
| 152 | $\text{O}_2^{**} + \text{O}_2 \rightarrow \text{O}_2 (\text{a}^1\Delta) + \text{O}_2$                          | 0.00     | 0     | 0     |
| 153 | $\text{O}_2^{**} + \text{O}_2 \rightarrow \text{O}_2 (\text{b}^1\Sigma) + \text{O}_2$                          | 1.86E-19 | 0     | 0     |
| 154 | $\text{O} (^1\text{D}) + \text{O}_2 (\text{a}^1\Delta) \rightarrow \text{O} + \text{O}_2$                      | 1.00E-17 | 0     | 0     |
| 155 | $\text{O} (^1\text{S}) + \text{O}_2 \rightarrow \text{O} + \text{O}_2 (\text{a}^1\Delta)$                      | 1.50E-18 | 0     | 850   |
| 156 | $\text{O} (^1\text{S}) + \text{O}_2 \rightarrow \text{O} + \text{O}_2 (\text{b}^1\Sigma)$                      | 7.30E-19 | 0     | 850   |
| 157 | $\text{O} (^1\text{S}) + \text{O}_2 \rightarrow \text{O} + \text{O}_2^{**}$                                    | 7.30E-19 | 0     | 850   |
| 158 | $\text{O} (^1\text{S}) + \text{O}_2 (\text{a}^1\Delta) \rightarrow \text{O} + \text{O}_2^{**}$                 | 1.30E-16 | 0     | 0     |
| 159 | $\text{O}_2 (\text{b}^1\Sigma) + \text{O}_3 \rightarrow \text{O}_2 (\text{a}^1\Delta) + \text{O}_3$            | 7.10E-18 | 0     | 0     |
| 160 | $\text{O}_2 (\text{a}^1\Delta) + \text{O} + \text{O}_2 \rightarrow \text{O}_2 (\text{b}^1\Sigma) + \text{O}_3$ | 1.56E-40 | -1.5  | 0     |
| 161 | $\text{O}_2 (\text{a}^1\Delta) + \text{O} + \text{O}_2 \rightarrow 2 \text{O}_2 + \text{O}$                    | 3.00E-44 | 0     | 0     |
| 162 | $\text{O} + \text{O}_3 \rightarrow \text{O}_2 (\text{a}^1\Delta) + \text{O}_2$                                 | 2.40E-19 | 0     | 2060  |
| 163 | $\text{O} + \text{O}_3 \rightarrow \text{O}_2 (\text{b}^1\Sigma) + \text{O}_2$                                 | 8.00E-20 | 0     | 2060  |
| 164 | $2\text{O}_3 \rightarrow \text{O} + \text{O}_2 + \text{O}_3$                                                   | 1.65E-15 | 0     | 11435 |
| 165 | $2\text{O} + \text{O}_2 \rightarrow \text{O}_2^{**} + \text{O}_2$                                              | 1.20E-46 | 0     | 0     |
| 166 | $2\text{O} + \text{O}_2 \rightarrow \text{O}_2 (\text{b}^1\Sigma) + \text{O}_2$                                | 7.60E-44 | -1    | 170   |
| 167 | $\text{O} + \text{O}_3 + \text{O}_2 \rightarrow 2\text{O}_3$                                                   | 1.30E-41 | -2    | 0     |
| 168 | $\text{O}_2^+ + 2 \text{O}_2 \rightarrow \text{O}_4^+ + \text{O}_2$                                            | 1.25E-38 | -1.5  | 0     |
| 169 | $\text{O}_4^+ + \text{O}_2 (\text{a}^1\Delta) \rightarrow \text{O}_2^+ + 2 \text{O}_2$                         | 1.00E-16 | 0     | 0     |
| 170 | $\text{O}_4^+ + \text{O}_2 (\text{b}^1\Sigma) \rightarrow \text{O}_2^+ + 2 \text{O}_2$                         | 1.00E-16 | 0     | 0     |
| 171 | $\text{O}_4^+ + \text{O} \rightarrow \text{O}_2^+ + \text{O}_3$                                                | 3.00E-16 | 0     | 0     |
| 172 | $\text{O}_4^+ + \text{O}_2 \rightarrow \text{O}_2^+ + 2 \text{O}_2$                                            | 2.67E-02 | -4    | 5030  |
| 173 | $\text{O}^- + \text{O}_2 (\text{a}^1\Delta) \rightarrow \text{O}_2^- + \text{O}$                               | 3.30E-17 | 0     | 0     |
| 174 | $\text{O}^- + \text{O}_2 \rightarrow \text{O}_2^- + \text{O}$                                                  | 1.00E-20 | 0     | 0     |
| 175 | $\text{O}^- + \text{O}_2 \rightarrow \text{O} + \text{e} + \text{O}_2$                                         | 2.00E-16 | 0     | 15000 |
| 176 | $\text{O}^- + 2 \text{O}_2 \rightarrow \text{O}_3^- + \text{O}_2$                                              | 3.30E-40 | -1    | 0     |

|     |                                                                                     |          |       |       |
|-----|-------------------------------------------------------------------------------------|----------|-------|-------|
| 177 | $\text{O}_2^- + \text{O}_2 \rightarrow 2 \text{O}_2 + \text{e}$                     | 2.00E-16 | 0     | 5338  |
| 178 | $\text{O}^- + \text{O}^+ \rightarrow \text{O}_2$                                    | 2.70E-13 |       | 0     |
| 179 | $\text{O}^- + \text{O}_4^+ \rightarrow \text{O}_2 + \text{O}_3$                     | 6.90E-12 | -0.5  | 0     |
| 180 | $\text{O}^- + \text{O}_2^+ + \text{O}_2 \rightarrow \text{O}_3 + \text{O}_2$        | 2.00E-37 | 0     | 0     |
| 181 | $\text{O}_2^- + \text{O}_2^+ + \text{O}_2 \rightarrow 3 \text{O}_2$                 | 2.00E-37 | 0     | 0     |
| 182 | $\text{O}_2^- + \text{O}_4^+ \rightarrow 3 \text{O}_2$                              | 1.00E-13 | 0     | 0     |
| 183 | $\text{O}_3^- + \text{O} \rightarrow \text{e} + 2 \text{O}_2$                       | 3.00E-16 | 0     | 0     |
| 184 | $\text{O}_3^- + \text{O}_2 \rightarrow \text{O}^- + 2 \text{O}_2$                   | 1.62E-06 | -2    | 18260 |
| 185 | $\text{O}_3^- + \text{O}_4^+ \rightarrow \text{O} + 3 \text{O}_2$                   | 1.00E-13 | 0     | 0     |
| 186 | $\text{O}_2^- + \text{O}_4^+ + \text{O}_2 \rightarrow 4 \text{O}_2$                 | 4.00E-38 | 0     | 0     |
| 187 | $\text{O}_3^- + \text{O}_4^+ + \text{O}_2 \rightarrow \text{O} + 4 \text{O}_2$      | 4.00E-38 | 0     | 0     |
| 188 | $\text{e} + \text{O}_3 + \text{O}_2 \rightarrow \text{O}_3^- + \text{O}_2$          | 4.60E-43 | 0     | 0     |
| 189 | $\text{e} + \text{O}_2^+ \rightarrow \text{O} + \text{O} (^1\text{S})$              | 2.42E-13 | -0.55 | 0     |
| 190 | $\text{e} + \text{O}_4^+ \rightarrow 2 \text{O}_2$                                  | 2.42E-11 | -0.5  | 0     |
| 191 | $\text{e} + \text{O}_4^+ \rightarrow \text{O}_2^{*+} + \text{O}_2$                  | 2.43E-12 | -0.5  | 0     |
| 192 | $\text{N}_2 (\text{A}^3\Sigma_u^+) + \text{O}_2 \rightarrow \text{N}_2 + 2\text{O}$ | 2.29E-12 | 0     | 0     |
| 193 | $\text{N}_2 (\text{a}^1\Sigma_u^-) + \text{O}_2 \rightarrow \text{N}_2 + 2\text{O}$ | 2.29E-12 | 0     | 0     |
| 194 | $\text{N}_2 (\text{C}^3\Pi_u) + \text{O}_2 \rightarrow \text{N}_2 + 2\text{O}$      | 2.00E-12 | 0     | 0     |
| 195 | $\text{N}_2 (\text{B}^3\Pi_g) + \text{O}_2 \rightarrow \text{N}_2 + 2\text{O}$      | 2.00E-12 | 0     | 0     |
| 196 | $\text{O}_2^- + \text{N}_2 \rightarrow \text{O}_2 + \text{N}_2 + \text{e}$          | 1.56E-19 | 0.5   | 4990  |
| 197 | $\text{O}_2^- + \text{N} \rightarrow \text{O}_2 + \text{N} + \text{e}$              | 5.00E-16 | 0     | 0     |

**Table S2.** Considered surface chemical reactions

| No. | Chemical reactions                    | $A, \text{m}^3 \text{kmol}^{-1} \text{K}^{-n} \text{s}^{-1}$ | $n$ | $E_j/R, \text{K}$ |
|-----|---------------------------------------|--------------------------------------------------------------|-----|-------------------|
| 1   | $\text{N}^+ \rightarrow \text{N}$     | 1                                                            | 0   | 0                 |
| 2   | $\text{N}_2^+ \rightarrow \text{N}_2$ | 1                                                            | 0   | 0                 |

|    |                                                            |   |   |   |
|----|------------------------------------------------------------|---|---|---|
| 3  | $\text{N}_3^+ \rightarrow \text{N}_2 + \text{N}$           | 1 | 0 | 0 |
| 4  | $\text{N}_4^+ \rightarrow 2 \text{N}_2$                    | 1 | 0 | 0 |
| 5  | $\text{N}_2 (\text{A}^3\Sigma_u^+) \rightarrow \text{N}_2$ | 1 | 0 | 0 |
| 6  | $\text{N}_2 (\text{a}^1\Sigma_u^-) \rightarrow \text{N}_2$ | 1 | 0 | 0 |
| 7  | $\text{N}_2 (\text{B}^3\Pi_g) \rightarrow \text{N}_2$      | 1 | 0 | 0 |
| 8  | $\text{N}_2 (\text{C}^3\Pi_u) \rightarrow \text{N}_2$      | 1 | 0 | 0 |
| 9  | $\text{O}_2^+ \rightarrow \text{O}_2$                      | 1 | 0 | 0 |
| 10 | $\text{O} \rightarrow 0.5 \text{O}_2$                      | 1 | 0 | 0 |
| 11 | $\text{O} (^1\text{D}) \rightarrow \text{O}$               | 1 | 0 | 0 |
| 12 | $\text{O}^- \rightarrow \text{O}$                          | 1 | 0 | 0 |
| 13 | $\text{O}_2 (\text{v}) \rightarrow \text{O}_2$             | 1 | 0 | 0 |
| 14 | $\text{O}^+ \rightarrow \text{O}$                          | 1 | 0 | 0 |
| 15 | $\text{O} (^1\text{S}) \rightarrow \text{O}$               | 1 | 0 | 0 |
| 16 | $\text{O}_2 (\text{a}^1\Delta) \rightarrow \text{O}_2$     | 1 | 0 | 0 |
| 17 | $\text{O}_2 (\text{b}^1\Sigma) \rightarrow \text{O}_2$     | 1 | 0 | 0 |
| 18 | $\text{O}_2^- \rightarrow \text{O}_2$                      | 1 | 0 | 0 |
| 19 | $\text{O}_3^- \rightarrow \text{O}_3$                      | 1 | 0 | 0 |
| 20 | $\text{O}_2^{**} \rightarrow \text{O}_2$                   | 1 | 0 | 0 |
| 21 | $\text{O}_4^+ \rightarrow 2 \text{O}_2$                    | 1 | 0 | 0 |

**Table S3.1.** Collision cross section 1

| $E_e, \text{eV}$ | Cross section $\times 10^{16}, \text{cm}^2$ |
|------------------|---------------------------------------------|
| 0                | 0                                           |
| 15.6             | 0                                           |
| 16               | 0.0195                                      |
| 16.5             | 0.0428                                      |
| 17               | 0.066                                       |
| 17.5             | 0.0911                                      |
| 18               | 0.12                                        |
| 18.5             | 0.1516                                      |



|      |        |
|------|--------|
| 19   | 0.1841 |
| 19.5 | 0.213  |
| 20   | 0.2502 |
| 21   | 0.3181 |
| 22   | 0.3869 |
| 23   | 0.4557 |
| 25   | 0.5924 |
| 30   | 0.9579 |
| 34   | 1.1718 |
| 45   | 1.6461 |
| 60   | 2.0181 |
| 75   | 2.2134 |
| 100  | 2.3436 |
| 150  | 2.2692 |
| 200  | 2.1018 |
| 300  | 1.7763 |
| 500  | 1.3485 |
| 700  | 1.0788 |
| 1000 | 0.8556 |
| 1500 | 0.744  |

**Table S3.2.** Collision cross section 2

| $E_e$ , eV | Cross section $\times 10^{16}$ , cm <sup>2</sup> |
|------------|--------------------------------------------------|
| 0          | 0                                                |
| 6.17       | 0                                                |
| 7          | 0.001                                            |
| 7.8        | 0.0028                                           |
| 8.5        | 0.0043                                           |

|      |        |
|------|--------|
| 9    | 0.0057 |
| 10   | 0.0082 |
| 11   | 0.01   |
| 12   | 0.012  |
| 13   | 0.013  |
| 14   | 0.014  |
| 16   | 0.015  |
| 17   | 0.015  |
| 18   | 0.014  |
| 20   | 0.012  |
| 22   | 0.01   |
| 24   | 0.0089 |
| 26   | 0.0076 |
| 30   | 0.0059 |
| 34   | 0.0049 |
| 40   | 0.0039 |
| 50   | 0.0034 |
| 70   | 0.0007 |
| 150  | 0      |
| 500  | 0      |
| 1000 | 0      |

**Table S3.3.** Collision cross section 3

| $E_e$ , eV | Cross section $\times 10^{16}$ , cm <sup>2</sup> |
|------------|--------------------------------------------------|
| 0          | 0                                                |
| 8.4        | 0                                                |
| 9          | 0.0067                                           |
| 11         | 0.0302                                           |

|         |          |
|---------|----------|
| 13      | 0.0536   |
| 14      | 0.0643   |
| 15      | 0.0697   |
| 16      | 0.057    |
| 17      | 0.0429   |
| 18      | 0.0348   |
| 19      | 0.0308   |
| 20      | 0.0275   |
| 24      | 0.0201   |
| 30      | 0.0154   |
| 40      | 0.0124   |
| 50      | 0.0121   |
| 70      | 0.0101   |
| 150     | 0.0067   |
| 500     | 0        |
| 1000    | 0        |
| 46.17   | 0.00113  |
| 56.17   | 0.00101  |
| 76.17   | 0.000214 |
| 156.17  | 0        |
| 506.17  | 0        |
| 1006.17 | 0        |

**Table S3.4.** Collision cross section 4

| $E_e$ , eV | Cross section $\times 10^{16}$ , cm <sup>2</sup> |
|------------|--------------------------------------------------|
| 10.79      | 0                                                |
| 14.5       | 0.3                                              |
| 20         | 0.84                                             |

|     |      |
|-----|------|
| 30  | 1.66 |
| 40  | 2.05 |
| 50  | 2.24 |
| 60  | 2.3  |
| 70  | 2.3  |
| 80  | 2.22 |
| 90  | 2.15 |
| 100 | 2.06 |
| 132 | 1.8  |
| 200 | 1.33 |

**Table S3.5.** Collision cross section 5

| $E_e$ , eV | Cross section $\times 10^{16}$ , cm <sup>2</sup> |
|------------|--------------------------------------------------|
| 0          | 1.1                                              |
| 0.001      | 1.36                                             |
| 0.002      | 1.49                                             |
| 0.003      | 1.62                                             |
| 0.005      | 1.81                                             |
| 0.007      | 2                                                |
| 0.0085     | 2.1                                              |
| 0.01       | 2.19                                             |
| 0.015      | 2.55                                             |
| 0.02       | 2.85                                             |
| 0.03       | 3.4                                              |
| 0.04       | 3.85                                             |
| 0.05       | 4.33                                             |
| 0.07       | 5.1                                              |
| 0.1        | 5.95                                             |

|      |      |
|------|------|
| 0.12 | 6.45 |
| 0.15 | 7.1  |
| 0.17 | 7.4  |
| 0.2  | 7.9  |
| 0.25 | 8.5  |
| 0.3  | 9    |
| 0.35 | 9.4  |
| 0.4  | 9.7  |
| 0.5  | 9.9  |
| 0.7  | 10   |
| 1    | 10   |
| 1.2  | 10.4 |
| 1.3  | 11   |
| 1.5  | 12   |
| 1.7  | 13.8 |
| 1.9  | 19.6 |
| 2.1  | 27   |
| 2.2  | 28.5 |
| 2.5  | 30   |
| 2.8  | 28   |
| 3    | 21.7 |
| 3.3  | 17.2 |
| 3.6  | 14.7 |
| 4    | 12.6 |
| 4.5  | 11.3 |
| 5    | 10.9 |
| 6    | 10.4 |
| 7    | 10.1 |

|      |      |
|------|------|
| 8    | 10   |
| 10   | 10.4 |
| 12   | 10.9 |
| 15   | 11   |
| 17   | 10.7 |
| 20   | 10.2 |
| 25   | 9.5  |
| 30   | 9    |
| 50   | 8.6  |
| 75   | 6.6  |
| 100  | 5.8  |
| 150  | 4.9  |
| 200  | 4.2  |
| 300  | 3.3  |
| 500  | 2.44 |
| 700  | 1.96 |
| 1000 | 1.55 |

**Table S3.6.** Collision cross section 6

| $E_e$ , eV | Cross section $\times 10^{16}$ , cm <sup>2</sup> |
|------------|--------------------------------------------------|
| 0          | 0                                                |
| 4.4        | 0                                                |
| 4.9        | 0                                                |
| 5.38       | 0.0023                                           |
| 5.86       | 0.0072                                           |
| 6.1        | 0.0108                                           |
| 6.48       | 0.0138                                           |
| 6.77       | 0.0152                                           |

|       |        |
|-------|--------|
| 7.05  | 0.0156 |
| 7.3   | 0.0148 |
| 7.53  | 0.0131 |
| 7.77  | 0.011  |
| 8     | 0.0084 |
| 8.25  | 0.0054 |
| 8.73  | 0.0028 |
| 9.2   | 0.0014 |
| 9.68  | 0.0008 |
| 10.15 | 0.0008 |
| 11.35 | 0.0008 |
| 100   | 0      |

**Table S3.7.** Collision cross section 7

| $E_e$ , eV | Cross section $\times 10^{16}$ , cm <sup>2</sup> |
|------------|--------------------------------------------------|
| 0          | 0                                                |
| 0.19       | 0                                                |
| 0.2        | 0.001                                            |
| 0.21       | 0.001                                            |
| 0.23       | 0                                                |
| 0.32       | 0                                                |
| 0.33       | 0.415                                            |
| 0.35       | 0                                                |
| 0.44       | 0                                                |
| 0.45       | 1.35                                             |
| 0.47       | 0                                                |
| 0.56       | 0                                                |
| 0.57       | 1.85                                             |

|      |        |
|------|--------|
| 0.59 | 0      |
| 0.68 | 0      |
| 0.69 | 1.65   |
| 0.71 | 0      |
| 0.79 | 0      |
| 0.8  | 1      |
| 0.82 | 0      |
| 0.9  | 0      |
| 0.91 | 0.6    |
| 0.93 | 0      |
| 1.02 | 0      |
| 1.03 | 0.285  |
| 1.05 | 0      |
| 1.13 | 0      |
| 1.14 | 0.1125 |
| 1.16 | 0      |
| 1.23 | 0      |
| 1.24 | 0.0475 |
| 1.26 | 0      |
| 1.34 | 0      |
| 1.35 | 0.0165 |
| 1.37 | 0      |
| 1.44 | 0      |
| 1.45 | 0.0055 |
| 1.47 | 0      |
| 1.54 | 0      |
| 1.55 | 0.002  |
| 1.57 | 0      |



|      |        |
|------|--------|
| 1.63 | 0      |
| 1.65 | 0.0007 |
| 1.67 | 0      |
| 3.5  | 0      |
| 4    | 0      |
| 5    | 0      |
| 100  | 0      |

**Table S3.8.** Collision cross section 8

| $E_e$ , eV | Cross section $\times 10^{16}$ , cm <sup>2</sup> |
|------------|--------------------------------------------------|
| 0          | 0                                                |
| 0.38       | 0                                                |
| 0.44       | 0                                                |
| 0.45       | 0                                                |
| 0.47       | 0                                                |
| 0.56       | 0                                                |
| 0.57       | 0.14                                             |
| 0.59       | 0                                                |
| 0.68       | 0                                                |
| 0.69       | 0.415                                            |
| 0.71       | 0                                                |
| 0.79       | 0                                                |
| 0.8        | 0.535                                            |
| 0.82       | 0                                                |
| 0.9        | 0                                                |
| 0.91       | 0.465                                            |
| 0.93       | 0                                                |
| 1.02       | 0                                                |

|      |        |
|------|--------|
| 1.03 | 0.315  |
| 1.05 | 0      |
| 1.13 | 0      |
| 1.14 | 0.2    |
| 1.16 | 0      |
| 1.23 | 0      |
| 1.24 | 0.095  |
| 1.26 | 0      |
| 1.34 | 0      |
| 1.35 | 0.04   |
| 1.37 | 0      |
| 1.44 | 0      |
| 1.45 | 0.0185 |
| 1.47 | 0      |
| 1.54 | 0      |
| 1.55 | 0.0085 |
| 1.57 | 0      |
| 1.63 | 0      |
| 1.65 | 0.0034 |
| 1.67 | 0      |
| 3.5  | 0      |
| 4    | 0      |
| 5    | 0      |
| 100  | 0      |

**Table S3.9.** Collision cross section 9

| $E_e$ , eV | Cross section $\times 10^{16}$ , cm <sup>2</sup> |
|------------|--------------------------------------------------|
| 0          | 0                                                |

|      |        |
|------|--------|
| 0.57 | 0      |
| 0.68 | 0      |
| 0.69 | 0.0037 |
| 0.71 | 0      |
| 0.79 | 0      |
| 0.8  | 0.0215 |
| 0.82 | 0      |
| 0.9  | 0      |
| 0.91 | 0.09   |
| 0.93 | 0      |
| 1.02 | 0      |
| 1.03 | 0.12   |
| 1.05 | 0      |
| 1.13 | 0      |
| 1.14 | 0.115  |
| 1.16 | 0      |
| 1.23 | 0      |
| 1.24 | 0.095  |
| 1.26 | 0      |
| 1.34 | 0      |
| 1.35 | 0.055  |
| 1.37 | 0      |
| 1.44 | 0      |
| 1.45 | 0.03   |
| 1.47 | 0      |
| 1.54 | 0      |
| 1.55 | 0.0165 |
| 1.57 | 0      |

|      |        |
|------|--------|
| 1.63 | 0      |
| 1.65 | 0.008  |
| 1.67 | 0      |
| 3.5  | 0      |
| 4    | 0      |
| 5    | 0      |
| 6    | 0.0125 |
| 7    | 0.0363 |
| 8    | 0.0588 |
| 9    | 0.075  |
| 10   | 0.0675 |
| 11   | 0.0563 |
| 12   | 0.0475 |
| 13   | 0.03   |
| 14   | 0.0175 |
| 15   | 0.0088 |
| 20   | 0      |
| 45   | 0      |
| 100  | 0      |

**Table S3.10.** Collision cross section 10

| $E_e$ , eV | Cross section $\times 10^{16}$ , cm <sup>2</sup> |
|------------|--------------------------------------------------|
| 0          | 0                                                |
| 0.75       | 0                                                |
| 0.79       | 0                                                |
| 0.8        | 0.0015                                           |
| 0.82       | 0                                                |
| 0.9        | 0                                                |

|      |        |
|------|--------|
| 0.91 | 0.0055 |
| 0.93 | 0      |
| 1.02 | 0      |
| 1.03 | 0.0004 |
| 1.05 | 0      |
| 1.13 | 0      |
| 1.14 | 0.0165 |
| 1.16 | 0      |
| 1.23 | 0      |
| 1.24 | 0.0315 |
| 1.26 | 0      |
| 1.34 | 0      |
| 1.35 | 0.0335 |
| 1.37 | 0      |
| 1.44 | 0      |
| 1.45 | 0.0285 |
| 1.47 | 0      |
| 1.54 | 0      |
| 1.55 | 0.0215 |
| 1.57 | 0      |
| 1.63 | 0      |
| 1.65 | 0.0165 |
| 1.67 | 0      |
| 6    | 0      |
| 7    | 0.0275 |
| 8    | 0.035  |
| 9    | 0.0413 |
| 10   | 0.0463 |

|     |        |
|-----|--------|
| 11  | 0.0313 |
| 12  | 0.025  |
| 13  | 0.0175 |
| 14  | 0.0088 |
| 15  | 0      |
| 100 | 0      |

**Table S3.11.** Collision cross section 11

| $E_e$ , eV | Cross section $\times 10^{16}$ , cm <sup>2</sup> |
|------------|--------------------------------------------------|
| 0          | 0                                                |
| 0.977      | 0                                                |
| 1.5        | 0.0058                                           |
| 2          | 0.0153                                           |
| 3          | 0.038                                            |
| 3.5        | 0.049                                            |
| 4          | 0.057                                            |
| 5          | 0.074                                            |
| 5.62       | 0.0825                                           |
| 5.91       | 0.0862                                           |
| 6.19       | 0.0888                                           |
| 6.53       | 0.0908                                           |
| 6.99       | 0.0914                                           |
| 7.61       | 0.0891                                           |
| 7.89       | 0.0863                                           |
| 8.96       | 0.0768                                           |
| 10.04      | 0.0679                                           |
| 13         | 0.0527                                           |

|      |        |
|------|--------|
| 15.1 | 0.0455 |
| 17.5 | 0.0387 |
| 20.5 | 0.0324 |
| 24.9 | 0.0256 |
| 30.9 | 0.0196 |
| 41   | 0.0137 |
| 45   | 0.012  |
| 100  | 0      |

**Table S3.12.** Collision cross section 12

| $E_e$ , eV | Cross section $\times 10^{16}$ , cm <sup>2</sup> |
|------------|--------------------------------------------------|
| 0          | 0                                                |
| 1.627      | 0                                                |
| 2          | 0.0026                                           |
| 3          | 0.0097                                           |
| 3.5        | 0.0133                                           |
| 4          | 0.0139                                           |
| 5          | 0.0182                                           |
| 5.69       | 0.0194                                           |
| 6.54       | 0.0194                                           |
| 7.34       | 0.0191                                           |
| 8.41       | 0.0183                                           |
| 9.26       | 0.0174                                           |
| 10         | 0.016                                            |
| 13         | 0.0131                                           |
| 14.9       | 0.0117                                           |
| 17         | 0.0103                                           |
| 19.4       | 0.0092                                           |

|      |        |
|------|--------|
| 20.7 | 0.0086 |
| 22.5 | 0.008  |
| 24   | 0.0072 |
| 28   | 0.0061 |
| 35.1 | 0.0047 |
| 41.9 | 0.0034 |
| 45.1 | 0.0031 |
| 100  | 0      |

**Table S3.13.** Collision cross section 13

| $E_e$ , eV | Cross section $\times 10^{16}$ , cm <sup>2</sup> |
|------------|--------------------------------------------------|
| 0          | 0                                                |
| 4.5        | 0                                                |
| 4.8        | 0.003                                            |
| 5          | 0.009                                            |
| 5.5        | 0.03                                             |
| 6          | 0.065                                            |
| 6.5        | 0.085                                            |
| 7          | 0.095                                            |
| 7.5        | 0.1                                              |
| 8          | 0.1                                              |
| 9          | 0.085                                            |
| 10         | 0.07                                             |
| 12         | 0.045                                            |
| 15         | 0                                                |
| 50         | 0                                                |
| 100        | 0                                                |

**Table S3.14.** Collision cross section 14



| $E_e$ , eV | Cross section $\times 10^{16}$ , cm <sup>2</sup> |
|------------|--------------------------------------------------|
| 0          | 0                                                |
| 6          | 0                                                |
| 7          | 0.15                                             |
| 7.8        | 0.23                                             |
| 9          | 0.23                                             |
| 10         | 0.21                                             |
| 12         | 0.165                                            |
| 15         | 0.105                                            |
| 17         | 0.065                                            |
| 20         | 0.0475                                           |
| 45         | 0.019                                            |
| 100        | 0                                                |

**Table S3.15.** Collision cross section 15

| $E_e$ , eV | Cross section $\times 10^{16}$ , cm <sup>2</sup> |
|------------|--------------------------------------------------|
| 0          | 0                                                |
| 12.6       | 0                                                |
| 13         | 0.025                                            |
| 18         | 0.25                                             |
| 28         | 1.024                                            |
| 38         | 1.775                                            |
| 48         | 2.07                                             |
| 58         | 2.41                                             |
| 68         | 2.61                                             |
| 78         | 2.81                                             |
| 88         | 2.84                                             |
| 100        | 2.9                                              |

**Table S3.16.** Collision cross section 16

| $E_e$ , eV | Cross section $\times 10^{16}$ , cm <sup>2</sup> |
|------------|--------------------------------------------------|
| 17         | 0                                                |
| 18         | 1.9E-19                                          |
| 19         | 2.7E-19                                          |
| 20         | 4.8E-19                                          |
| 22.5       | 1.8E-18                                          |
| 25         | 4.2E-18                                          |
| 27.5       | 7.8E-18                                          |
| 30         | 1.15E-17                                         |
| 32.5       | 1.62E-17                                         |
| 35         | 2.28E-17                                         |
| 40         | 3.22E-17                                         |
| 45         | 4.08E-17                                         |
| 50         | 4.8E-17                                          |
| 55         | 5.58E-17                                         |
| 60         | 6.307E-17                                        |
| 65         | 7.069E-17                                        |
| 70         | 7.596E-17                                        |
| 75         | 8.169E-17                                        |
| 80         | 8.639E-17                                        |
| 85         | 8.87E-17                                         |
| 90         | 9.149E-17                                        |
| 95         | 9.418E-17                                        |
| 100        | 9.657E-17                                        |
| 105        | 9.836E-17                                        |
| 110        | 9.984E-17                                        |

|     |           |
|-----|-----------|
| 115 | 1.01E-16  |
| 120 | 1.017E-16 |
| 125 | 1.022E-16 |
| 130 | 1.024E-16 |
| 135 | 1.025E-16 |
| 140 | 1.026E-16 |
| 145 | 1.026E-16 |
| 150 | 1.023E-16 |
| 155 | 1.019E-16 |
| 160 | 1.015E-16 |
| 165 | 1.01E-16  |
| 170 | 1.005E-16 |
| 175 | 9.974E-17 |
| 180 | 9.937E-17 |
| 185 | 9.85E-17  |
| 190 | 9.785E-17 |
| 195 | 9.71E-17  |
| 200 | 9.636E-17 |
| 210 | 9.487E-17 |
| 220 | 9.32E-17  |
| 230 | 9.137E-17 |
| 240 | 8.966E-17 |
| 250 | 8.786E-17 |
| 260 | 8.617E-17 |
| 270 | 8.449E-17 |
| 280 | 8.283E-17 |
| 290 | 8.128E-17 |
| 300 | 7.932E-17 |

|      |           |
|------|-----------|
| 350  | 7.174E-17 |
| 400  | 6.498E-17 |
| 450  | 5.89E-17  |
| 500  | 5.439E-17 |
| 550  | 5.045E-17 |
| 600  | 4.717E-17 |
| 650  | 4.419E-17 |
| 700  | 4.168E-17 |
| 750  | 3.947E-17 |
| 800  | 3.735E-17 |
| 850  | 3.541E-17 |
| 900  | 3.389E-17 |
| 950  | 3.265E-17 |
| 1000 | 3.206E-17 |

**Table S3.17.** Collision cross section 17

| $E_e$ , eV | Cross section $\times 10^{16}$ , cm <sup>2</sup> |
|------------|--------------------------------------------------|
| 0          | 2000                                             |
| 0.01       | 200                                              |
| 0.1        | 19.9                                             |
| 0.2        | 9.93                                             |
| 0.4        | 4.93                                             |
| 0.7        | 2.79                                             |
| 1          | 1.93                                             |
| 2          | 0.93                                             |
| 5          | 0.33                                             |
| 60         | 0.01                                             |

**Table S3.18.** Collision cross section 18

| $E_e$ , eV | Cross section $\times 10^{16}$ , cm <sup>2</sup> |
|------------|--------------------------------------------------|
| 11.6       | 0                                                |
| 12.7       | 0.029                                            |
| 17.7       | 0.242                                            |
| 21.7       | 0.446                                            |
| 25.4       | 0.676                                            |
| 32         | 1.08                                             |
| 53.8       | 1.4                                              |
| 61.7       | 1.44                                             |
| 80.9       | 1.5                                              |
| 92.6       | 1.52                                             |
| 105        | 1.52                                             |
| 600        | 1.23                                             |
| 1000       | 1.05                                             |

**Table S3.19.** Collision cross section 19

| $E_e$ , eV | Cross section $\times 10^{16}$ , cm <sup>2</sup> |
|------------|--------------------------------------------------|
| 0.2        | 0.036                                            |
| 0.4        | 0.0696                                           |
| 0.6        | 0.106                                            |
| 0.8        | 0.1454                                           |
| 1          | 0.183                                            |
| 1.2        | 0.2504                                           |
| 1.4        | 0.266667                                         |
| 1.6        | 0.212                                            |
| 1.8        | 0.1412                                           |
| 2          | 0.086                                            |
| 2.2        | 0.0516                                           |

|           |            |
|-----------|------------|
| 2.4       | 0.0262     |
| 2.6       | 0.0114     |
| 2.8       | 0.00479999 |
| 3–39.8001 | 0          |

**Table S3.20.** Collision cross section 20

| $E_e$ , eV | Cross section $\times 10^{16}$ , cm <sup>2</sup> |
|------------|--------------------------------------------------|
| 0.2        | 0                                                |
| 0.4        | 0.0036                                           |
| 0.6        | 0.0212                                           |
| 0.8        | 0.0806                                           |
| 1          | 0.163                                            |
| 1.2        | 0.170333                                         |
| 1.4        | 0.114                                            |
| 1.6        | 0.0479999                                        |
| 1.8        | 0.023                                            |
| 2          | 0.015                                            |
| 2.2        | 0.00699999                                       |
| 2.4        | 0.00199999                                       |
| 2.6        | 0                                                |
| 2.8        | 0                                                |
| 3–39.8001  | 0                                                |

**Table S3.21.** Collision cross section 21

| $E_e$ , eV | Cross section $\times 10^{16}$ , cm <sup>2</sup> |
|------------|--------------------------------------------------|
| 1.967      | 0                                                |
| 2.1        | 0.0082                                           |
| 2.4        | 0.0541                                           |

|     |        |
|-----|--------|
| 2.7 | 0.107  |
| 3   | 0.154  |
| 4   | 0.249  |
| 4.4 | 0.267  |
| 4.8 | 0.277  |
| 5   | 0.28   |
| 6   | 0.283  |
| 7   | 0.274  |
| 8   | 0.26   |
| 9   | 0.244  |
| 10  | 0.228  |
| 12  | 0.198  |
| 14  | 0.171  |
| 16  | 0.148  |
| 18  | 0.129  |
| 20  | 0.112  |
| 25  | 0.0807 |
| 30  | 0.059  |
| 40  | 0.0334 |
| 45  | 0.0258 |
| 50  | 0.0202 |
| 55  | 0.0161 |
| 70  | 0.0087 |
| 100 | 0.0033 |
| 150 | 0.0011 |
| 200 | 0.0005 |

**Table S3.22.** Collision cross section 22

| $E_e$ , eV | Cross section $\times 10^{16}$ , cm <sup>2</sup> |
|------------|--------------------------------------------------|
| 4.19       | 0                                                |
| 4.4        | 0.0054                                           |
| 4.8        | 0.013                                            |
| 5          | 0.016                                            |
| 6          | 0.0257                                           |
| 7          | 0.0302                                           |
| 8          | 0.0322                                           |
| 9          | 0.0328                                           |
| 10         | 0.0327                                           |
| 12         | 0.0315                                           |
| 14         | 0.0297                                           |
| 16         | 0.0279                                           |
| 18         | 0.0261                                           |
| 20         | 0.0244                                           |
| 25         | 0.0209                                           |
| 30         | 0.018                                            |
| 40         | 0.0137                                           |
| 45         | 0.0121                                           |
| 50         | 0.0107                                           |
| 55         | 0.0095                                           |
| 70         | 0.0069                                           |
| 100        | 0.0038                                           |
| 150        | 0.0016                                           |
| 200        | 0.0008                                           |

**Table S3.23.** Collision cross section 23

| $E_e$ , eV | Cross section $\times 10^{16}$ , cm <sup>2</sup> |
|------------|--------------------------------------------------|
|------------|--------------------------------------------------|



|        |       |
|--------|-------|
| 13.618 | 0     |
| 14     | 0.026 |
| 16     | 0.163 |
| 18     | 0.265 |
| 20     | 0.36  |
| 25     | 0.53  |
| 30     | 0.688 |
| 35     | 0.823 |
| 40     | 0.965 |
| 50     | 1.153 |
| 60     | 1.243 |
| 70     | 1.282 |
| 80     | 1.31  |
| 90     | 1.32  |
| 100    | 1.33  |
| 150    | 1.31  |
| 200    | 1.24  |
| 300    | 1.042 |
| 400    | 0.893 |
| 500    | 0.792 |
| 600    | 0.694 |
| 700    | 0.622 |
| 800    | 0.565 |
| 900    | 0.519 |
| 1000   | 0.481 |

**Table S3.24.** Collision cross section 24

|            |                                                  |
|------------|--------------------------------------------------|
| $E_e$ , eV | Cross section $\times 10^{16}$ , cm <sup>2</sup> |
|------------|--------------------------------------------------|

|     |           |
|-----|-----------|
| 0.2 | 0.0605831 |
| 0.4 | 0.119172  |
| 0.6 | 0.172667  |
| 0.8 | 0.218381  |
| 1   | 0.256231  |
| 1.2 | 0.27584   |
| 1.4 | 0.292789  |
| 1.6 | 0.310268  |
| 1.8 | 0.328102  |
| 2   | 0.346182  |
| 2.2 | 0.352951  |
| 2.4 | 0.358084  |
| 2.6 | 0.359331  |
| 2.8 | 0.360289  |
| 3   | 0.359587  |
| 3.2 | 0.356378  |
| 3.4 | 0.353122  |
| 3.6 | 0.350257  |
| 3.8 | 0.347727  |
| 4   | 0.345484  |
| 4.2 | 0.341063  |
| 4.4 | 0.336418  |
| 4.6 | 0.332002  |
| 4.8 | 0.327789  |
| 5   | 0.323754  |
| 5.2 | 0.3189    |
| 5.4 | 0.314006  |
| 5.6 | 0.309252  |

|      |          |
|------|----------|
| 5.8  | 0.304623 |
| 6    | 0.30011  |
| 6.2  | 0.295316 |
| 6.4  | 0.290545 |
| 6.6  | 0.285863 |
| 6.8  | 0.281264 |
| 7    | 0.27674  |
| 7.2  | 0.272286 |
| 7.4  | 0.267896 |
| 7.6  | 0.263565 |
| 7.8  | 0.259289 |
| 8    | 0.255064 |
| 8.2  | 0.251073 |
| 8.4  | 0.247162 |
| 8.6  | 0.243291 |
| 8.8  | 0.239458 |
| 9    | 0.23566  |
| 9.2  | 0.231896 |
| 9.4  | 0.228162 |
| 9.6  | 0.224458 |
| 9.8  | 0.220781 |
| 10   | 0.21713  |
| 10.2 | 0.213778 |
| 10.4 | 0.210501 |
| 10.6 | 0.207245 |
| 10.8 | 0.20401  |
| 11   | 0.200793 |
| 11.2 | 0.197593 |

|      |          |
|------|----------|
| 11.4 | 0.194411 |
| 11.6 | 0.191244 |
| 11.8 | 0.188093 |
| 12   | 0.184956 |
| 12.2 | 0.182193 |
| 12.4 | 0.179514 |
| 12.6 | 0.176846 |
| 12.8 | 0.174189 |
| 13   | 0.171543 |
| 13.2 | 0.168906 |
| 13.4 | 0.16628  |
| 13.6 | 0.163663 |
| 13.8 | 0.161055 |
| 14   | 0.158455 |
| 14.2 | 0.15622  |
| 14.4 | 0.154062 |
| 14.6 | 0.151912 |
| 14.8 | 0.149768 |
| 15   | 0.14763  |
| 15.2 | 0.145498 |
| 15.4 | 0.143372 |
| 15.6 | 0.141252 |
| 15.8 | 0.139137 |
| 16   | 0.137028 |
| 16.2 | 0.1351   |
| 16.4 | 0.133212 |
| 16.6 | 0.131328 |
| 16.8 | 0.129448 |

|      |           |
|------|-----------|
| 17   | 0.127573  |
| 17.2 | 0.125702  |
| 17.4 | 0.123834  |
| 17.6 | 0.12197   |
| 17.8 | 0.12011   |
| 18   | 0.118253  |
| 18.2 | 0.116793  |
| 18.4 | 0.115414  |
| 18.6 | 0.114038  |
| 18.8 | 0.112664  |
| 19   | 0.111293  |
| 19.2 | 0.109924  |
| 19.4 | 0.108557  |
| 19.6 | 0.107193  |
| 19.8 | 0.105831  |
| 20   | 0.104471  |
| 20.2 | 0.103113  |
| 20.4 | 0.101758  |
| 20.6 | 0.100404  |
| 20.8 | 0.0990518 |
| 21   | 0.0977018 |
| 21.2 | 0.0963535 |
| 21.4 | 0.0950071 |
| 21.6 | 0.0936623 |
| 21.8 | 0.0923192 |
| 22   | 0.0909778 |
| 22.2 | 0.0896379 |
| 22.4 | 0.0882995 |

|      |           |
|------|-----------|
| 22.6 | 0.0869627 |
| 22.8 | 0.0856273 |
| 23   | 0.0842933 |
| 23.2 | 0.0832947 |
| 23.4 | 0.0823632 |
| 23.6 | 0.0814327 |
| 23.8 | 0.0805032 |
| 24   | 0.0795748 |
| 24.2 | 0.0786473 |
| 24.4 | 0.0777208 |
| 24.6 | 0.0767952 |
| 24.8 | 0.0758706 |
| 25   | 0.0749468 |
| 25.2 | 0.0740239 |
| 25.4 | 0.0731018 |
| 25.6 | 0.0721806 |
| 25.8 | 0.0712602 |
| 26   | 0.0703405 |
| 26.2 | 0.0694217 |
| 26.4 | 0.0685036 |
| 26.6 | 0.0675862 |
| 26.8 | 0.0666696 |
| 27   | 0.0657536 |
| 27.2 | 0.0648384 |
| 27.4 | 0.0639239 |
| 27.6 | 0.06301   |
| 27.8 | 0.0620967 |
| 28   | 0.0611841 |

|         |           |
|---------|-----------|
| 28.2    | 0.0605796 |
| 28.4    | 0.0600363 |
| 28.6    | 0.0594934 |
| 28.8    | 0.0589509 |
| 29      | 0.0584089 |
| 29.2    | 0.0578672 |
| 29.4    | 0.057326  |
| 29.6    | 0.0567851 |
| 29.8    | 0.0562446 |
| 30      | 0.0557045 |
| 30.2    | 0.0551647 |
| 30.4    | 0.0546254 |
| 30.6    | 0.0540863 |
| 30.8    | 0.0535476 |
| 31      | 0.0530093 |
| 31.2    | 0.0524713 |
| 31.4    | 0.0519336 |
| 31.6    | 0.0513962 |
| 31.8    | 0.0508591 |
| 32      | 0.0503224 |
| 32.2001 | 0.0497859 |
| 32.4001 | 0.0492498 |
| 32.6001 | 0.0487139 |
| 32.8001 | 0.0481784 |
| 33.0001 | 0.0476431 |
| 33.2001 | 0.0471081 |
| 33.4001 | 0.0465733 |
| 33.6001 | 0.0460388 |

|         |           |
|---------|-----------|
| 33.8001 | 0.0455046 |
| 34.0001 | 0.0449707 |
| 34.2001 | 0.044437  |
| 34.4001 | 0.0439035 |
| 34.6001 | 0.0433703 |
| 34.8001 | 0.0428374 |
| 35.0001 | 0.0423046 |
| 35.2001 | 0.0417721 |
| 35.4001 | 0.0412399 |
| 35.6001 | 0.0407078 |
| 35.8001 | 0.040176  |
| 36.0001 | 0.0396444 |
| 36.2001 | 0.039113  |
| 36.4001 | 0.0385818 |
| 36.6001 | 0.0380508 |
| 36.8001 | 0.0375201 |
| 37.0001 | 0.0369895 |
| 37.2001 | 0.0364591 |
| 37.4001 | 0.0359289 |
| 37.6001 | 0.0353989 |
| 37.8001 | 0.0348692 |
| 38.0001 | 0.0343395 |
| 38.2001 | 0.0339883 |
| 38.4001 | 0.0336723 |
| 38.6001 | 0.0333564 |
| 38.8001 | 0.0330406 |
| 39.0001 | 0.0327249 |
| 39.2001 | 0.0324094 |



|         |           |
|---------|-----------|
| 39.4001 | 0.032094  |
| 39.6001 | 0.0317787 |
| 39.8001 | 0.0314635 |

**Table S3.25.** Collision cross section 25

| $E_e$ , eV | Cross section $\times 10^{16}$ , cm <sup>2</sup> |
|------------|--------------------------------------------------|
| 0.2        | 0                                                |
| 0.4        | 0                                                |
| 0.6        | 0                                                |
| 0.8        | 0                                                |
| 1          | 0                                                |
| 1.2        | 0                                                |
| 1.4        | 0                                                |
| 1.6        | 0                                                |
| 1.8        | 0                                                |
| 2          | 0                                                |
| 2.2        | 0                                                |
| 2.4        | 0                                                |
| 2.6        | 0                                                |
| 2.8        | 0                                                |
| 3          | 0                                                |
| 3.2        | 0                                                |
| 3.4        | 0                                                |
| 3.6        | 0                                                |
| 3.8        | 0                                                |
| 4          | 0                                                |
| 4.2        | 0                                                |
| 4.4        | 0                                                |

|     |   |
|-----|---|
| 4.6 | 0 |
| 4.8 | 0 |
| 5   | 0 |
| 5.2 | 0 |
| 5.4 | 0 |
| 5.6 | 0 |
| 5.8 | 0 |
| 6   | 0 |
| 6.2 | 0 |
| 6.4 | 0 |
| 6.6 | 0 |
| 6.8 | 0 |
| 7   | 0 |
| 7.2 | 0 |
| 7.4 | 0 |
| 7.6 | 0 |
| 7.8 | 0 |
| 8   | 0 |
| 8.2 | 0 |
| 8.4 | 0 |
| 8.6 | 0 |
| 8.8 | 0 |
| 9   | 0 |
| 9.2 | 0 |
| 9.4 | 0 |
| 9.6 | 0 |
| 9.8 | 0 |
| 10  | 0 |

|      |           |
|------|-----------|
| 10.2 | 0         |
| 10.4 | 0         |
| 10.6 | 0         |
| 10.8 | 0         |
| 11   | 0         |
| 11.2 | 0         |
| 11.4 | 0         |
| 11.6 | 0         |
| 11.8 | 0.0101409 |
| 12   | 0.0237535 |
| 12.2 | 0.037439  |
| 12.4 | 0.051139  |
| 12.6 | 0.064839  |
| 12.8 | 0.078539  |
| 13   | 0.092239  |
| 13.2 | 0.105939  |
| 13.4 | 0.119639  |
| 13.6 | 0.133339  |
| 13.8 | 0.147039  |
| 14   | 0.160739  |
| 14.2 | 0.171517  |
| 14.4 | 0.181717  |
| 14.6 | 0.191916  |
| 14.8 | 0.202117  |
| 15   | 0.212317  |
| 15.2 | 0.222517  |
| 15.4 | 0.232716  |
| 15.6 | 0.242917  |

|      |          |
|------|----------|
| 15.8 | 0.253117 |
| 16   | 0.263317 |
| 16.2 | 0.272932 |
| 16.4 | 0.282432 |
| 16.6 | 0.291932 |
| 16.8 | 0.301432 |
| 17   | 0.310932 |
| 17.2 | 0.320432 |
| 17.4 | 0.329932 |
| 17.6 | 0.339432 |
| 17.8 | 0.348932 |
| 18   | 0.358432 |
| 18.2 | 0.365678 |
| 18.4 | 0.372478 |
| 18.6 | 0.379278 |
| 18.8 | 0.386078 |
| 19   | 0.392878 |
| 19.2 | 0.399678 |
| 19.4 | 0.406478 |
| 19.6 | 0.413278 |
| 19.8 | 0.420078 |
| 20   | 0.426878 |
| 20.2 | 0.433678 |
| 20.4 | 0.440478 |
| 20.6 | 0.447278 |
| 20.8 | 0.454078 |
| 21   | 0.460878 |
| 21.2 | 0.467678 |

|      |          |
|------|----------|
| 21.4 | 0.474478 |
| 21.6 | 0.481278 |
| 21.8 | 0.488078 |
| 22   | 0.494878 |
| 22.2 | 0.501678 |
| 22.4 | 0.508478 |
| 22.6 | 0.515278 |
| 22.8 | 0.522079 |
| 23   | 0.528879 |
| 23.2 | 0.535278 |
| 23.4 | 0.541598 |
| 23.6 | 0.547918 |
| 23.8 | 0.554238 |
| 24   | 0.560558 |
| 24.2 | 0.566878 |
| 24.4 | 0.573198 |
| 24.6 | 0.579518 |
| 24.8 | 0.585838 |
| 25   | 0.592158 |
| 25.2 | 0.598478 |
| 25.4 | 0.604798 |
| 25.6 | 0.611118 |
| 25.8 | 0.617438 |
| 26   | 0.623758 |
| 26.2 | 0.630078 |
| 26.4 | 0.636398 |
| 26.6 | 0.642718 |
| 26.8 | 0.649038 |

|         |          |
|---------|----------|
| 27      | 0.655358 |
| 27.2    | 0.661678 |
| 27.4    | 0.667998 |
| 27.6    | 0.674318 |
| 27.8    | 0.680638 |
| 28      | 0.686958 |
| 28.2    | 0.69251  |
| 28.4    | 0.69791  |
| 28.6    | 0.70331  |
| 28.8    | 0.70871  |
| 29      | 0.71411  |
| 29.2    | 0.71951  |
| 29.4    | 0.72491  |
| 29.6    | 0.73031  |
| 29.8    | 0.73571  |
| 30      | 0.74111  |
| 30.2    | 0.74651  |
| 30.4    | 0.75191  |
| 30.6    | 0.75731  |
| 30.8    | 0.76271  |
| 31      | 0.76811  |
| 31.2    | 0.77351  |
| 31.4    | 0.77891  |
| 31.6    | 0.78431  |
| 31.8    | 0.78971  |
| 32      | 0.79511  |
| 32.2001 | 0.80051  |
| 32.4001 | 0.80591  |

|         |          |
|---------|----------|
| 32.6001 | 0.81131  |
| 32.8001 | 0.81671  |
| 33.0001 | 0.82211  |
| 33.2001 | 0.827744 |
| 33.4001 | 0.833424 |
| 33.6001 | 0.839104 |
| 33.8001 | 0.844784 |
| 34.0001 | 0.850464 |
| 34.2001 | 0.856144 |
| 34.4001 | 0.861824 |
| 34.6001 | 0.867505 |
| 34.8001 | 0.873185 |
| 35.0001 | 0.878865 |
| 35.2001 | 0.884545 |
| 35.4001 | 0.890224 |
| 35.6001 | 0.895904 |
| 35.8001 | 0.901585 |
| 36.0001 | 0.907265 |
| 36.2001 | 0.912945 |
| 36.4001 | 0.918625 |
| 36.6001 | 0.924305 |
| 36.8001 | 0.929985 |
| 37.0001 | 0.935665 |
| 37.2001 | 0.941345 |
| 37.4001 | 0.947025 |
| 37.6001 | 0.952705 |
| 37.8001 | 0.958385 |
| 38.0001 | 0.964065 |

|         |          |
|---------|----------|
| 38.2001 | 0.968141 |
| 38.4001 | 0.971901 |
| 38.6001 | 0.975661 |
| 38.8001 | 0.979421 |
| 39.0001 | 0.983181 |
| 39.2001 | 0.986941 |
| 39.4001 | 0.990701 |
| 39.6001 | 0.994461 |
| 39.8001 | 0.998221 |

**Table S3.26.** Collision cross section 26

| $E_e$ , eV | Cross section $\times 10^{16}$ , cm <sup>2</sup> |
|------------|--------------------------------------------------|
| 0          | 4.206                                            |
| 0.9808     | 4.206                                            |
| 1.009      | 4.39                                             |
| 1.05       | 4.499                                            |
| 1.077      | 4.56                                             |
| 1.118      | 4.702                                            |
| 1.169      | 4.81                                             |
| 1.216      | 4.936                                            |
| 1.282      | 5.096                                            |
| 1.35       | 5.205                                            |
| 1.427      | 5.357                                            |
| 1.529      | 5.547                                            |
| 1.636      | 5.752                                            |
| 1.836      | 6.075                                            |
| 1.964      | 6.232                                            |
| 2.167      | 6.413                                            |



|       |       |
|-------|-------|
| 2.283 | 6.53  |
| 2.53  | 6.77  |
| 2.778 | 7.052 |
| 2.976 | 7.081 |
| 3.263 | 7.197 |
| 3.544 | 7.226 |
| 3.856 | 7.322 |
| 4.24  | 7.43  |
| 4.577 | 7.471 |
| 4.881 | 7.422 |
| 5.285 | 7.417 |
| 5.636 | 7.391 |
| 6.085 | 7.432 |
| 6.7   | 7.313 |
| 7.666 | 7.25  |
| 8.313 | 7.246 |
| 9.281 | 7.173 |
| 10.49 | 7.079 |
| 11.32 | 7.01  |
| 13.46 | 6.979 |
| 13.97 | 6.786 |
| 16.14 | 6.424 |
| 16.9  | 6.304 |
| 18.07 | 6.195 |
| 20.21 | 5.993 |
| 21.88 | 5.871 |
| 23.65 | 5.716 |
| 25.25 | 5.548 |

|       |       |
|-------|-------|
| 27.67 | 5.344 |
| 30.75 | 5.067 |
| 32.33 | 4.927 |
| 34.37 | 4.746 |
| 35.98 | 4.615 |
| 39.67 | 4.41  |
| 41.97 | 4.275 |
| 44.34 | 4.131 |
| 47.2  | 3.979 |
| 50.4  | 3.845 |
| 54.73 | 3.703 |
| 61.46 | 3.495 |
| 67.04 | 3.346 |
| 70.39 | 3.248 |
| 78.09 | 3.09  |
| 90.13 | 2.902 |
| 98.01 | 2.71  |
| 104.8 | 2.591 |
| 109.6 | 2.554 |
| 117.9 | 2.453 |
| 130.2 | 2.305 |
| 141.1 | 2.186 |
| 150.7 | 2.096 |
| 157.2 | 2.013 |
| 174.1 | 1.909 |
| 186.5 | 1.816 |
| 201.9 | 1.725 |
| 223.2 | 1.614 |

|       |        |
|-------|--------|
| 247.2 | 1.493  |
| 280.1 | 1.375  |
| 307   | 1.284  |
| 334.8 | 1.22   |
| 359.1 | 1.153  |
| 396.9 | 1.08   |
| 426   | 1.037  |
| 498.4 | 0.9433 |
| 550.3 | 0.8769 |
| 598.4 | 0.8228 |
| 676.9 | 0.7313 |
| 759.9 | 0.6591 |
| 828.7 | 0.6108 |
| 906.7 | 0.5722 |
| 957.9 | 0.5581 |
| 1024  | 0.5417 |

**Table S3.27.** Collision cross section 27

| $E_e$ , eV | Cross section $\times 10^{16}$ , cm <sup>2</sup> |
|------------|--------------------------------------------------|
| 9.146      | 0                                                |
| 9.9        | 0.0035                                           |
| 10.1       | 0.0054                                           |
| 10.5       | 0.0106                                           |
| 11         | 0.0137                                           |
| 12         | 0.0178                                           |
| 14         | 0.0233                                           |
| 16         | 0.0285                                           |
| 18         | 0.0319                                           |

|     |         |
|-----|---------|
| 20  | 0.0308  |
| 22  | 0.0278  |
| 25  | 0.0229  |
| 28  | 0.0177  |
| 30  | 0.0151  |
| 35  | 0.0091  |
| 40  | 0.0061  |
| 45  | 0.0043  |
| 50  | 0.0031  |
| 55  | 0.0023  |
| 60  | 0.0018  |
| 70  | 0.0011  |
| 100 | 0.0004  |
| 150 | 0.00011 |
| 200 | 5E-5    |

**Table S3.28.** Collision cross section 28

| $E_e$ , eV | Cross section $\times 10^{16}$ , cm <sup>2</sup> |
|------------|--------------------------------------------------|
| 9.51       | 0                                                |
| 9.9        | 0.0342                                           |
| 10.1       | 0.0441                                           |
| 10.5       | 0.0548                                           |
| 11         | 0.0628                                           |
| 12         | 0.0771                                           |
| 14         | 0.0987                                           |
| 16         | 0.105                                            |
| 18         | 0.11                                             |
| 20         | 0.111                                            |

|     |        |
|-----|--------|
| 22  | 0.108  |
| 25  | 0.105  |
| 28  | 0.093  |
| 30  | 0.0869 |
| 35  | 0.0837 |
| 40  | 0.081  |
| 45  | 0.0795 |
| 50  | 0.0781 |
| 55  | 0.0762 |
| 60  | 0.0745 |
| 70  | 0.0716 |
| 100 | 0.063  |
| 150 | 0.0527 |
| 200 | 0.0437 |

**Table S3.29.** Collision cross section 29

| $E_e$ , eV | Cross section $\times 10^{16}$ , cm <sup>2</sup> |
|------------|--------------------------------------------------|
| 10.73      | 0                                                |
| 11.1       | 0.0022                                           |
| 11.3       | 0.0071                                           |
| 11.5       | 0.01                                             |
| 12         | 0.0131                                           |
| 14         | 0.0231                                           |
| 16         | 0.0235                                           |
| 18         | 0.0223                                           |
| 20         | 0.021                                            |
| 22         | 0.0186                                           |
| 24         | 0.0161                                           |

|     |         |
|-----|---------|
| 26  | 0.0118  |
| 28  | 0.0088  |
| 30  | 0.0067  |
| 35  | 0.0042  |
| 40  | 0.0028  |
| 45  | 0.002   |
| 50  | 0.0014  |
| 55  | 0.0011  |
| 60  | 0.0008  |
| 70  | 0.0005  |
| 100 | 0.00018 |
| 150 | 5E-5    |
| 200 | 2E-5    |

**Table S3.30.** Collision cross section 30

| $E_e$ , eV | Cross section $\times 10^{16}$ , cm <sup>2</sup> |
|------------|--------------------------------------------------|
| 10.98      | 0                                                |
| 11.1       | 0.0015                                           |
| 11.3       | 0.0047                                           |
| 11.5       | 0.0142                                           |
| 12         | 0.0272                                           |
| 14         | 0.0522                                           |
| 16         | 0.0663                                           |
| 18         | 0.0752                                           |
| 20         | 0.077                                            |
| 22         | 0.0713                                           |
| 24         | 0.0626                                           |
| 26         | 0.0532                                           |

|     |        |
|-----|--------|
| 28  | 0.0458 |
| 30  | 0.04   |
| 35  | 0.0341 |
| 40  | 0.0313 |
| 45  | 0.0295 |
| 50  | 0.028  |
| 55  | 0.0254 |
| 60  | 0.0232 |
| 70  | 0.0191 |
| 100 | 0.011  |
| 150 | 0.0073 |
| 200 | 0.0055 |

**Table S3.31.** Collision cross section 31

| $E_e$ , eV | Cross section $\times 10^{16}$ , cm <sup>2</sup> |
|------------|--------------------------------------------------|
| 0          | 0.35                                             |
| 0.001      | 0.35                                             |
| 0.002      | 0.36                                             |
| 0.003      | 0.4                                              |
| 0.005      | 0.5                                              |
| 0.007      | 0.58                                             |
| 0.0085     | 0.64                                             |
| 0.01       | 0.7                                              |
| 0.015      | 0.87                                             |
| 0.02       | 0.99                                             |
| 0.03       | 1.24                                             |
| 0.04       | 1.44                                             |
| 0.05       | 1.6                                              |

|      |      |
|------|------|
| 0.07 | 2.1  |
| 0.1  | 2.5  |
| 0.12 | 2.8  |
| 0.15 | 3.1  |
| 0.17 | 3.3  |
| 0.2  | 3.6  |
| 0.25 | 4.1  |
| 0.3  | 4.5  |
| 0.35 | 4.7  |
| 0.4  | 5.2  |
| 0.5  | 5.7  |
| 0.7  | 6.1  |
| 1    | 7.2  |
| 1.2  | 7.9  |
| 1.3  | 7.9  |
| 1.5  | 7.6  |
| 1.7  | 7.3  |
| 1.9  | 6.9  |
| 2.1  | 6.6  |
| 2.2  | 6.5  |
| 2.5  | 6.1  |
| 2.8  | 5.8  |
| 3    | 5.7  |
| 3.3  | 5.5  |
| 3.6  | 5.45 |
| 4    | 5.5  |
| 4.5  | 5.55 |
| 5    | 5.6  |



|     |     |
|-----|-----|
| 6   | 6   |
| 7   | 6.6 |
| 8   | 7.1 |
| 10  | 8   |
| 12  | 8.5 |
| 15  | 8.8 |
| 17  | 8.7 |
| 20  | 8.6 |
| 25  | 8.2 |
| 30  | 8   |
| 50  | 7.7 |
| 75  | 6.8 |
| 100 | 6.5 |

**Table S3.32.** Collision cross section 32

| $E_e$ , eV | Cross section $\times 10^{16}$ , cm <sup>2</sup> |
|------------|--------------------------------------------------|
| 0          | 0                                                |
| 0.02       | 0                                                |
| 0.07       | 0                                                |
| 0.08       | 0.0054                                           |
| 0.1        | 0                                                |
| 0.2        | 0                                                |
| 0.21       | 0.0216                                           |
| 0.22       | 0                                                |
| 0.32       | 0                                                |
| 0.33       | 0.0384                                           |
| 0.35       | 0                                                |
| 0.44       | 0                                                |

|      |        |
|------|--------|
| 0.45 | 0.054  |
| 0.47 | 0      |
| 0.56 | 0      |
| 0.57 | 0.0672 |
| 0.59 | 0      |
| 0.68 | 0      |
| 0.69 | 0.0804 |
| 0.71 | 0      |
| 0.79 | 0      |
| 0.8  | 0.0936 |
| 0.81 | 0      |
| 0.9  | 0      |
| 0.91 | 0.084  |
| 0.93 | 0      |
| 1.02 | 0      |
| 1.03 | 0.072  |
| 1.05 | 0      |
| 1.13 | 0      |
| 1.14 | 0.0468 |
| 1.16 | 0      |
| 1.22 | 0      |
| 1.23 | 0.06   |
| 1.26 | 0      |
| 1.34 | 0      |
| 1.35 | 0.036  |
| 1.37 | 0      |
| 1.44 | 0      |
| 1.45 | 0.024  |

|      |        |
|------|--------|
| 1.47 | 0      |
| 1.54 | 0      |
| 1.55 | 0.012  |
| 1.57 | 0      |
| 1.64 | 0      |
| 1.65 | 0.0048 |
| 1.67 | 0      |
| 100  | 0      |

**Table S3.33.** Collision cross section 33

| $E_e$ , eV | Cross section $\times 10^{16}$ , cm <sup>2</sup> |
|------------|--------------------------------------------------|
| 0          | 0                                                |
| 4          | 0                                                |
| 5          | 0.042                                            |
| 6          | 0.1                                              |
| 7          | 0.176                                            |
| 8          | 0.231                                            |
| 9          | 0.247                                            |
| 10         | 0.234                                            |
| 11         | 0.186                                            |
| 12         | 0.143                                            |
| 13         | 0.102                                            |
| 14         | 0.071                                            |
| 15         | 0.04                                             |
| 20         | 0.01                                             |
| 45         | 0                                                |
| 100        | 0                                                |

**Table S3.34.** Collision cross section 34

| $E_e$ , eV | Cross section $\times 10^{16}$ , cm <sup>2</sup> |
|------------|--------------------------------------------------|
| 0          | 0                                                |
| 4          | 0                                                |
| 5          | 0.028                                            |
| 6          | 0.04                                             |
| 7          | 0.073                                            |
| 8          | 0.094                                            |
| 9          | 0.11                                             |
| 10         | 0.109                                            |
| 11         | 0.093                                            |
| 12         | 0.073                                            |
| 13         | 0.051                                            |
| 14         | 0.028                                            |
| 15         | 0.013                                            |
| 20         | 0.005                                            |
| 45         | 0                                                |
| 100        | 0                                                |

**Table S3.35.** Collision cross section 35

| $E_e$ , eV | Cross section $\times 10^{16}$ , cm <sup>2</sup> |
|------------|--------------------------------------------------|
| 0          | 0                                                |
| 8.4        | 0                                                |
| 9.4        | 1                                                |
| 30         | 1.2                                              |
| 50         | 1.17                                             |
| 100        | 0.94                                             |

**Table S3.36.** Collision cross section 36

| $E_e$ , eV | Cross section $\times 10^{16}$ , cm <sup>2</sup> |
|------------|--------------------------------------------------|
| 0          | 0                                                |
| 10         | 0                                                |
| 20         | 0.013                                            |
| 30         | 0.026                                            |
| 40         | 0.04                                             |
| 50         | 0.05                                             |
| 60         | 0.06                                             |
| 70         | 0.065                                            |
| 80         | 0.07                                             |
| 100        | 0.07                                             |

**Table S3.37.** Collision cross section 37

| $E_e$ , eV | Cross section $\times 10^{16}$ , cm <sup>2</sup> |
|------------|--------------------------------------------------|
| 0          | 0                                                |
| 14.7       | 0                                                |
| 20         | 0.0085                                           |
| 30         | 0.016                                            |
| 40         | 0.0225                                           |
| 50         | 0.028                                            |
| 60         | 0.037                                            |
| 70         | 0.038                                            |
| 80         | 0.039                                            |
| 100        | 0.038                                            |

**Table S3.38.** Collision cross section 38

| $E_e$ , eV | Cross section $\times 10^{16}$ , cm <sup>2</sup> |
|------------|--------------------------------------------------|
| 0.5        | 0                                                |

|      |      |
|------|------|
| 0.8  | 0.03 |
| 1    | 0.05 |
| 1.5  | 0.1  |
| 1.8  | 0.12 |
| 2    | 0.13 |
| 2.5  | 0.16 |
| 3    | 0.18 |
| 3.5  | 0.21 |
| 4    | 0.23 |
| 4.5  | 0.24 |
| 5    | 0.25 |
| 5.5  | 0.25 |
| 6.2  | 0.24 |
| 7    | 0.22 |
| 8.5  | 0.21 |
| 9.5  | 0.19 |
| 10.5 | 0.18 |
| 11.5 | 0.17 |
| 12   | 0.16 |
| 14   | 0.15 |
| 16   | 0.12 |
| 18   | 0.1  |
| 50   | 0.1  |

**Table S3.39.** Collision cross section 39

| $E_e$ , eV | Cross section $\times 10^{16}$ , cm <sup>2</sup> |
|------------|--------------------------------------------------|
| 0          | 0.01                                             |
| 0.3        | 0.016                                            |

|      |           |
|------|-----------|
| 0.5  | 0.02      |
| 1    | 0.03      |
| 1.3  | 0.0332    |
| 1.5  | 0.0347    |
| 2    | 0.04      |
| 2.5  | 0.0432    |
| 3    | 0.049     |
| 3.5  | 0.0526    |
| 4    | 0.054     |
| 4.5  | 0.0556    |
| 5    | 0.055     |
| 5.7  | 0.0522    |
| 6.5  | 0.0474    |
| 8    | 0.0446    |
| 9    | 0.0401    |
| 10   | 0.0378    |
| 11   | 0.0355455 |
| 11.5 | 0.0333913 |
| 13.5 | 0.0311    |
| 15.5 | 0.0248    |
| 17.5 | 0.0206    |
| 49.5 | 0.0202    |

**Table S3.40.** Collision cross section 40

| $E_e$ , eV | Cross section $\times 10^{16}$ , cm <sup>2</sup> |
|------------|--------------------------------------------------|
| 4.48       | 0                                                |
| 4.68       | 0.015                                            |
| 4.72       | 0.03                                             |

|      |       |
|------|-------|
| 6.21 | 0.163 |
| 6.37 | 0.174 |
| 6.6  | 0.177 |
| 6.84 | 0.167 |
| 7.12 | 0.155 |
| 7.39 | 0.141 |
| 9.91 | 0.042 |
| 10.4 | 0.031 |
| 11.5 | 0.01  |
| 40   | 0     |
| 100  | 0     |

**Table S3.41.** Collision cross section 41

| $E_e$ , eV | Cross section $\times 10^{16}$ , cm <sup>2</sup> |
|------------|--------------------------------------------------|
| 0          | 0.336                                            |
| 0.2        | 0.351                                            |
| 0.24       | 0.59                                             |
| 1.73       | 0.585                                            |
| 1.89       | 0.586                                            |
| 2.12       | 0.551                                            |
| 2.36       | 0.484017                                         |
| 2.64       | 0.41803                                          |
| 2.91       | 0.358072                                         |
| 5.43       | 0.0766519                                        |
| 5.94       | 0.0543805                                        |
| 7          | 0.0164                                           |
| 35.5       | 0                                                |
| 95.5       | 0                                                |



**Table S3.42.** Collision cross section 42

| $E_e$ , eV | Cross section $\times 10^{16}$ , cm <sup>2</sup> |
|------------|--------------------------------------------------|
| 3.48       | 0                                                |
| 3.68       | 0.015                                            |
| 3.72       | 0.03                                             |
| 5.21       | 0.163                                            |
| 5.37       | 0.174                                            |
| 5.6        | 0.177                                            |
| 5.84       | 0.167                                            |
| 6.12       | 0.155                                            |
| 6.39       | 0.141                                            |
| 8.91       | 0.042                                            |
| 9.4        | 0.031                                            |
| 10.5       | 0.01                                             |
| 40         | 0                                                |
| 100        | 0                                                |

**Table S3.43.** Collision cross section 43

| $E_e$ , eV | Cross section $\times 10^{16}$ , cm <sup>2</sup> |
|------------|--------------------------------------------------|
| 9.74       | 0                                                |
| 13         | 0.266                                            |
| 15.4       | 0.414                                            |
| 20.2       | 0.577                                            |
| 25.8       | 0.696                                            |
| 33         | 0.775                                            |
| 48         | 0.838                                            |
| 70         | 0.85                                             |
| 100        | 0.8                                              |

|     |     |
|-----|-----|
| 500 | 0.1 |
|-----|-----|

**Table S3.44.** Collision cross section 44

| $E_e$ , eV | Cross section $\times 10^{16}$ , cm <sup>2</sup> |
|------------|--------------------------------------------------|
| 2.6        | 0                                                |
| 2.63       | 0.000636                                         |
| 3.1        | 0.0007                                           |
| 3.3        | 0.00261                                          |
| 3.6        | 0.00458                                          |
| 4          | 0.00516                                          |
| 4.27       | 0.00566                                          |
| 4.56       | 0.00987                                          |
| 4.72       | 0.0143                                           |
| 4.75       | 0.0198                                           |
| 4.81       | 0.0338                                           |
| 4.95       | 0.0438                                           |
| 5.12       | 0.0488                                           |
| 5.26       | 0.0496                                           |
| 5.42       | 0.0488                                           |
| 5.61       | 0.0442                                           |
| 5.94       | 0.0365                                           |
| 6.51       | 0.0238                                           |
| 7.03       | 0.0177                                           |
| 7.68       | 0.0155                                           |
| 8.15       | 0.00898                                          |
| 8.73       | 0.00643                                          |
| 8.94       | 0.00592                                          |
| 20         | 0.001                                            |

|    |   |
|----|---|
| 40 | 0 |
|----|---|

**Table S3.45.** Collision cross section 45

| $E_e$ , eV | Cross section $\times 10^{16}$ , cm <sup>2</sup> |
|------------|--------------------------------------------------|
| 0          | 4E-8                                             |
| 0.01       | 4E-9                                             |
| 0.1        | 4E-10                                            |
| 0.2        | 2E-10                                            |
| 0.4        | 1E-10                                            |
| 0.7        | 5.6E-11                                          |
| 1          | 4E-11                                            |
| 2          | 1.8E-11                                          |
| 5          | 6.6E-12                                          |
| 60         | 2E-13                                            |

**Table S3.46.** Collision cross section 46

| $E_e$ , eV | Cross section $\times 10^{16}$ , cm <sup>2</sup> |
|------------|--------------------------------------------------|
| 0.03       | 5                                                |
| 2          | 7.5                                              |
| 3          | 9.2                                              |
| 4          | 10.6                                             |
| 5          | 9.7                                              |
| 6          | 10                                               |
| 7          | 9.3                                              |
| 8          | 9.3                                              |
| 10         | 10.4                                             |
| 15         | 10.7                                             |
| 20         | 11.6                                             |

|     |    |
|-----|----|
| 100 | 10 |
|-----|----|
